# Supplementary material for: A New Secondary Structure Assignment Algorithm Using Cα Backbone Fragments
Source: MDPI journal article supplement (doi:10.3390/ijms17030333), 2016-03-11
Supplement: s1 [file s1]

# Supplementary Materials: A New Secondary Structure Assignment Algorithm Using C $\alpha$ Backbone Fragments

Chen Cao, Guishen Wang, An Liu, Shutan Xu, Lincong Wang and Shuxue Zou

**Table S1.** The agreement of 11 secondary structure assignment methods on set L. The agreement percentage was computed using the Q3 score.

| Method  | Dssp | Stride | P-sea | Kaksi | Disicl | Palsse | Segno | Pross | Xtlsstr | Pcasso |
|---------|------|--------|-------|-------|--------|--------|-------|-------|---------|--------|
| Sasf    | 84.5 | 84.3   | 81.8  | 84.0  | 76.2   | 67.3   | 80.2  | 83.5  | 75.5    | 84.4   |
| Dssp    |      | 93.6   | 81.4  | 84.5  | 78.1   | 73.1   | 81.6  | 84.5  | 78.2    | 88.1   |
| Stride  |      |        | 82.7  | 85.6  | 78.0   | 75.2   | 81.1  | 85.0  | 78.3    | 89.6   |
| P-sea   |      |        |       | 82.4  | 76.5   | 71.9   | 82.4  | 83.2  | 72.8    | 83.8   |
| Kaksi   |      |        |       |       | 75.8   | 75.7   | 80.4  | 84.0  | 77.8    | 84.8   |
| Disicl  |      |        |       |       |        | 61.7   | 81.2  | 81.5  | 74.2    | 77.8   |
| Palsse  |      |        |       |       |        |        | 66.1  | 65.6  | 65.1    | 76.5   |
| Segno   |      |        |       |       |        |        |       | 85.7  | 75.3    | 81.1   |
| Pross   |      |        |       |       |        |        |       |       | 79.7    | 83.5   |
| Xtlsstr |      |        |       |       |        |        |       |       |         | 76.7   |

**Table S2.** The agreement of nine secondary structure assignment methods on set N. The agreement percentage was computed using the Q3 score. DISICL and SEGNO could not assign most proteins in set N for unknown reasons.

| Method  | Dssp | Stride | P-sea | Kaksi | Palsse | Pross | Xtlsstr | Pcasso |
|---------|------|--------|-------|-------|--------|-------|---------|--------|
| Sasf    | 84.3 | 85.6   | 78.3  | 83.2  | 69.5   | 81.9  | 76.6    | 85.1   |
| Dssp    |      | 94.3   | 80.1  | 83.8  | 71.5   | 84.3  | 76.8    | 90.6   |
| Stride  |      |        | 81.4  | 85.2  | 74.1   | 84.8  | 77.1    | 90.7   |
| P-sea   |      |        |       | 80.3  | 67.8   | 85.3  | 75.3    | 80.7   |
| Kaksi   |      |        |       |       | 73.4   | 83.6  | 77.9    | 84.2   |
| Palsse  |      |        |       |       |        | 65.8  | 67.7    | 72.7   |
| Pross   |      |        |       |       |        |       | 78.0    | 83.7   |
| Xtlsstr |      |        |       |       |        |       |         | 75.0   |

**Table S3.** Converting SSEs assigned by different programs into three states: H, E, C. "LH" is the abbreviation for a left-handed helix, whereas "AE" and "PE" are the abbreviations of antiparallel  $\beta$ -sheets and parallel  $\beta$ -sheets, respectively.

| Method  | H           | E      | C                     |
|---------|-------------|--------|-----------------------|
| SACF    | H, G, I, LH | AE, PE | C, B, P               |
| DSSP    | H, G, I     | E      | B, T, S, C            |
| STRIDE  | H, G, I     | E      | B, T, C               |
| P-SEA   | a           | b      | c                     |
| PALSSE  | HELIX       | SHEET  | " "                   |
| KAISI   | H           | b      | "."                   |
| DISICL  | 3HT, HEL    | BS     | IRB, BT, OTT, LHT, UC |
| PROSS   | H           | E      | T, P                  |
| SEGNO   | H,G,I       | E, e   | B, b, P, p, O         |
| XTLSSTR | H, h, G, g  | E, e   | T, P, "-"," U         |
| PCASSO  | H           | E      | C                     |

**Table S4.** Sources of 11 secondary structure assignment programs. We could not obtain other methods such as DEFINE, STICK, and SABA, as these programs are not available on the Internet.

| DSSP    | Available from <a href="http://swift.cmbi.ru.nl/gv/dssp/">http://swift.cmbi.ru.nl/gv/dssp/</a>                                                       |
|---------|------------------------------------------------------------------------------------------------------------------------------------------------------|
| STRIDE  | Available from <a href="http://webclu.bio.wzw.tum.de/stride/">http://webclu.bio.wzw.tum.de/stride/</a>                                               |
| KAKSI   | Available from <a href="http://www.dsimb.inserm.fr/~debrevn/TOOLS/KAKSI/">http://www.dsimb.inserm.fr/~debrevn/TOOLS/KAKSI/</a>                       |
| PBs     | Available from Prof. Alexandre G de Brevern directly                                                                                                 |
| P-SEA   | Available from <a href="http://biopython.org/DIST/docs/api/Bio.PDB.PSEA-module.html">http://biopython.org/DIST/docs/api/Bio.PDB.PSEA-module.html</a> |
| PCASSO  | Available from <a href="http://brooks.chem.lsa.umich.edu/software">http://brooks.chem.lsa.umich.edu/software</a>                                     |
| SEGNO   | Available from Prof. Simon Lovell directly                                                                                                           |
| PALSSE  | Available from <a href="http://prodata.swmed.edu/palsse/palsse.php">http://prodata.swmed.edu/palsse/palsse.php</a>                                   |
| XTLSSTR | Available from <a href="http://oregonstate.edu/dept/biochem/faculty/johnson.html">http://oregonstate.edu/dept/biochem/faculty/johnson.html</a>       |
| PROSS   | Available from <a href="http://folding.chemistry.msstate.edu/utis/pross.html">http://folding.chemistry.msstate.edu/utis/pross.html</a>               |
| DISICL  | Available from <a href="http://disicl.boku.ac.at/">http://disicl.boku.ac.at/</a>                                                                     |

(a)

| Residue number | Chain | Amino Acid | 2 <sup>nd</sup> structure | Donor interaction (residue-energy) | Acceptor interaction (residue-energy) | Donor interaction (residue-energy) | Acceptor interaction (residue-energy) |
|----------------|-------|------------|---------------------------|------------------------------------|---------------------------------------|------------------------------------|---------------------------------------|
| 48             | A     | E          | H                         | -4,-2.7                            | 4,-0.5                                | 1,-0.2                             | -1,-0.2                               |
| 49             | A     | R          | H                         | -4,-2.3                            | 3,-1.1                                | 1,-0.2                             | 4,-0.3                                |
| 50             | A     | L          | H                         | -4,-2.0                            | 3,-2.3                                | 1,-0.2                             | 4,-0.2                                |
| 51             | A     | E          | H                         | -4,-1.9                            | 3,-1.3                                | 1,-0.3                             | -1,-0.2                               |
| 52             | A     | V          | T                         | -3,-1.1                            | 4,-2.0                                | -4,-0.5                            | -1,-0.3                               |
| 53             | A     | A          | H                         | -3,-2.3                            | 4,-2.7                                | -4,-0.3                            | -1,-0.2                               |
| 54             | A     | D          | H                         | -3,-1.3                            | 4,-2.5                                | -4,-0.2                            | 5,-0.2                                |
| 55             | A     | P          | H                         | 0, 0.0                             | 4,-2.1                                | 0, 0.0                             | -1,-0.2                               |
| 56             | A     | V          | H                         | -4,-2.0                            | 4,-2.5                                | 2,-0.2                             | -2,-0.2                               |
| 57             | A     | A          | H                         | -4,-2.7                            | 4,-2.7                                | -5,-0.2                            | -1,-0.2                               |
| 58             | A     | A          | H                         | -4,-2.5                            | 4,-1.9                                | 1,-0.2                             | -2,-0.2                               |

(b)

| Residue number | Chain | Amino Acid | 2 <sup>nd</sup> structure | Donor interaction (residue-energy) | Acceptor interaction (residue-energy) | Donor interaction (residue-energy) | Acceptor interaction (residue-energy) |
|----------------|-------|------------|---------------------------|------------------------------------|---------------------------------------|------------------------------------|---------------------------------------|
| 87             | A     | A          | H                         | -4,-1.9                            | 4,-2.3                                | 1,-0.2                             | 5,-0.4                                |
| 88             | A     | F          | H                         | -4,-1.8                            | 5,-2.2                                | 1,-0.2                             | 4,-1.0                                |
| 89             | A     | D          | H                         | -4,-2.2                            | 5,-0.4                                | 3,-0.2                             | -1,-0.2                               |
| 90             | A     | T          | H                         | -4,-1.5                            | -2,-0.2                               | 3,-0.2                             | -1,-0.2                               |
| 91             | A     | K          | H                         | -4,-2.3                            | 4,-0.9                                | -21,-0.2                           | -3,-0.2                               |
| 92             | A     | F          | H                         | -4,-1.0                            | 4,-2.1                                | 5,-0.4                             | 3,-0.3                                |
| 93             | A     | W          | H                         | -5,-2.2                            | 4,-2.6                                | 1,-0.2                             | 5,-0.2                                |
| 94             | A     | G          | H                         | -6,-0.5                            | 4,-1.8                                | 5,-0.4                             | -1,-0.2                               |
| 95             | A     | A          | H                         | -4,-0.9                            | 4,-2.5                                | -3,-0.3                            | 5,-0.2                                |
| 96             | A     | V          | H                         | -4,-2.1                            | 4,-2.6                                | 1,-0.2                             | -2,-0.2                               |

(c)

| Residue number | Chain | Amino Acid | 2 <sup>nd</sup> structure | Donor interaction (residue-energy) | Acceptor interaction (residue-energy) | Donor interaction (residue-energy) | Acceptor interaction (residue-energy) |
|----------------|-------|------------|---------------------------|------------------------------------|---------------------------------------|------------------------------------|---------------------------------------|
| 149            | A     | A          | H                         | -4,-1.9                            | 4,-1.8                                | 1,-0.2                             | -1,-0.2                               |
| 150            | A     | M          | H                         | -4,-1.9                            | 4,-2.5                                | 1,-0.2                             | 5,-0.4                                |
| 151            | A     | I          | H                         | -4,-2.0                            | 4,-2.3                                | 1,-0.2                             | -1,-0.2                               |
| 152            | A     | E          | H                         | -4,-1.7                            | -1,-0.2                               | 1,-0.2                             | -2,-0.2                               |
| 153            | A     | H          | H                         | -4,-1.8                            | -2,-0.2                               | -5,-0.1                            | -1,-0.2                               |
| 154            | A     | Y          | H                         | -4,-2.5                            | 4,-0.5                                | -5,-0.2                            | -3,-0.2                               |
| 155            | A     | G          | H                         | -4,-2.3                            | 4,-1.8                                | -5,-0.4                            | 5,-0.2                                |
| 156            | A     | I          | H                         | 2,-0.2                             | 4,-2.1                                | 1,-0.2                             | 5,-0.2                                |
| 157            | A     | E          | H                         | 2,-0.2                             | 4,-2.2                                | 1,-0.2                             | -1,-0.2                               |
| 158            | A     | K          | H                         | -4,-0.5                            | 4,-2.2                                | 2,-0.2                             | -2,-0.2                               |
| 159            | A     | T          | H                         | -4,-1.8                            | 4,-2.4                                | 2,-0.2                             | -1,-0.2                               |

(d)

| Residue number | Chain | Amino Acid | 2 <sup>nd</sup> structure | Donor interaction (residue-energy) | Acceptor interaction (residue-energy) | Donor interaction (residue-energy) | Acceptor interaction (residue-energy) |
|----------------|-------|------------|---------------------------|------------------------------------|---------------------------------------|------------------------------------|---------------------------------------|
| 303            | B     | K          | H                         | -4,-1.8                            | 4,-0.2                                | 1,-0.2                             | -2,-0.2                               |
| 304            | B     | R          | H                         | -4,-2.3                            | 3,-0.4                                | -5,-0.2                            | 3,-0.3                                |
| 305            | B     | E          | H                         | -4,-2.8                            | 4,-1.8                                | 1,-0.2                             | 4,-0.6                                |
| 306            | B     | M          | T                         | -4,-2.7                            | 4,-0.3                                | -5,-0.4                            | -1,-0.2                               |
| 307            | B     | I          | T                         | -2,-0.4                            | 4,-1.2                                | -3,-0.3                            | 3,-1.0                                |
| 308            | B     | L          | T                         | -3,-1.8                            | 4,-0.4                                | -4,-0.4                            | -2,-0.2                               |
| 309            | B     | K          | T                         | -4,-0.6                            | 4,-0.6                                | 2,-0.2                             | -1,-0.2                               |
| 310            | B     | R          | H                         | -4,-1.0                            | 4,-1.7                                | -4,-0.3                            | -2,-0.2                               |
| 311            | B     | K          | H                         | -4,-1.2                            | 4,-0.2                                | 2,-0.2                             | -3,-0.2                               |
| 312            | B     | E          | H                         | -4,-0.4                            | -2,-0.9                               | -5,-0.1                            | -2,-0.2                               |
| 313            | B     | E          | H                         | -4,-0.6                            | 4,-1.6                                | 2,-0.2                             | -2,-0.2                               |

**Figure S1.** The hydrogen bond energy used by DSSP for secondary structure assignment. The data were obtained by DSSP for the proteins 2fp1 (a), 3ucf (b), 1q35 (c) and 1kb4 (d). The red rectangles indicate donor interactions, and the blue rectangles denote acceptor interactions. A careful examination of the hydrogen bond energies (kcal/mol) for these residues, as indicated by the rectangles, suggests that they could also be assigned to a 310-helix (residues 50–52, 2fp1) and  $\pi$ -helix (residues 89–93, 3ucf), even by the DSSP standard. As indicated in Figure 4c, an obvious ( $i, i + 4$ ) hydrogen bond break forms the kink. The overlaps in hydrogen bond pattern hinder the assignment of secondary structures using only empirically based hydrogen bond energy, and our method can make the assignment more visually acceptable.
